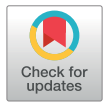

# Erratum. Diabetes Is Primary: Timely News and Notes for Primary Care Providers. *Clinical Diabetes* 2020;38: 4–8 (DOI: 10.2337/cd20-dp01)

Max Bingham

<https://doi.org/10.2337/cd20-er01>

The Diabetes Is Primary article in *Clinical Diabetes*, vol. 38, issue 1, was assigned an incorrect DOI. The correct DOI is 10.2337/cd20-dp01. The online version of this article was updated on 17 January 2020 to reflect this change.
